# Supplementary material
Source: publisher figshare collection journal article supplement (https://acs.figshare.com/ndownloader/files/4092529)
Supplement: Supplementary file 1 [file 4092529]

# Anomalous high ionic conductivity of nanoporous $\beta$ -Li<sub>3</sub>PS<sub>4</sub>

Zengcai Liu<sup>1</sup>, Wujun Fu<sup>1</sup>, E. Andrew Payzant<sup>1,2</sup>, Xiang Yu<sup>1</sup>, Zili Wu<sup>1,3</sup>, Nancy J. Dudney<sup>2</sup>, Jim Kiggans<sup>2</sup>, Kunlun Hong<sup>1</sup>, Adam J. Rondinone<sup>1</sup>, and Chengdu Liang<sup>1</sup>

<sup>1</sup> Center for Nanophase Materials Sciences, Oak Ridge National Laboratory, Oak Ridge, TN 37830, USA, <sup>2</sup> Materials Science and Technology Division, Oak Ridge National Laboratory, Oak Ridge, TN 37830, USA, <sup>3</sup> Chemical Sciences Division, Oak Ridge National Laboratory, Oak Ridge, TN 37830, USA

## Methods

**Synthesis and structural analysis:** In a typical synthesis, Li<sub>2</sub>S (Aldrich, 99%) and P<sub>2</sub>S<sub>5</sub> (Sigma-Aldrich, 99%) with a stoichiometry of 3 to 1 were mixed in anhydrous THF (Sigma-Aldrich, >99.9%) at room temperature in an argon-filled glove box. The mixture was then stirred overnight. The white precipitation was separated by centrifuge and washed with THF three times before collecting for characterization. As-synthesized precipitation was heated under house vacuum at 80 °C for the removal of THF. Heat treatments of samples at 100, 140, 160, 180, and 200 °C were conducted in the same manner as the removal of THF. The compositions of all samples were analyzed at Galbraith Laboratories (a commercial analysis service). SEM images were conducted on a field-emission scanning electron microscopy (SEM, Zeiss Merlin®) that was equipped with a specially designed stage for handling air-sensitive samples. N<sub>2</sub> adsorption/desorption isotherms were measured using a Micromeritic Gemini 275 system. Powder XRD patterns were collected on X'pert Pro Powder Diffractometer (PANalytical) with copper K $\alpha$  line. Small-angle x-ray scattering data were collected using a SAXSess instrument

(Anton-Paar) with Cu K $\alpha$  radiation in line mode. Raman spectra were conducted on an Acton Trivista 555 spectrometer (Princeton Instruments). All characterizations were handled with special care to avoid contact with air and moisture.

**Ionic conductivity measurements:** All materials have been pressed into dense pellets with sufficient mechanical strength for the measurements of ionic conductivity. Pellets (diameter 12.5 mm, thickness ~1 mm) were prepared by pressing the powder with carbon-coated aluminum foils (a free sample from Exopack) on both sides in an argon-filled glove box. The pellets have a density of 95% of the reported bulk materials. The carbon-coated aluminum foils served as blocking electrodes. Electrochemical impedance spectroscopy (EIS) measurements were carried out using a specially designed air-tight cell. The a.c. impedance measurements were conducted in the frequency range of 1 MHz to 1 Hz with the amplitude of 100 mV by using a frequency response analyzer (Solartron 1260). The temperature was controlled between -20 to 100 °C in a temperature chamber (Maccor,  $\pm 0.5$  °C). The EIS presents a semi-arc at high frequencies and a straight line at lower frequencies, an expected characteristic of a pure ionic conductor in nature (Fig S6). The intercept of straight line at the axis of  $Z_R$  was employed to determine the total ionic conductivity.

**Electrochemical characterization:** The cyclic voltammogram (CV) was measured on the Li/Li<sub>3</sub>PS<sub>4</sub>/Pt cell at a scan rate of 100 mVs<sup>-1</sup> between -0.2 and 5 V at room temperature by using a potentiostat (EG&G, 263A). The Li/Li<sub>3</sub>PS<sub>4</sub>/Li symmetric cells were cycled on a battery test system (Maccor 4000) with a current density of 0.1 mAcm<sup>-2</sup> at room temperature and 80 °C.

## Supplementary Figures

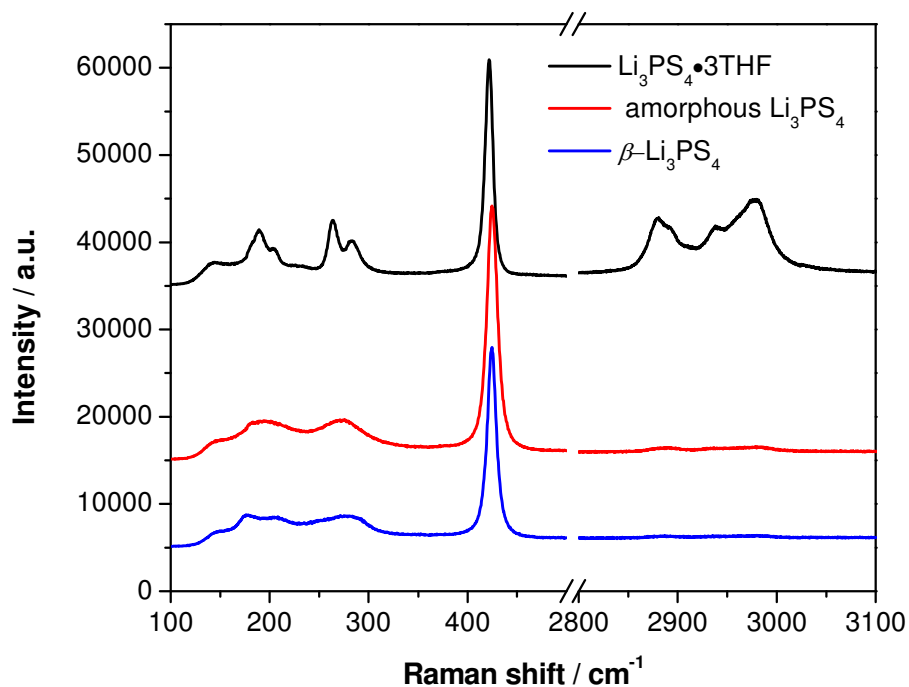

Fig S1 Raman spectra of  $\text{Li}_3\text{PS}_4 \cdot 3\text{THF}$  (as-synthesized particles), amorphous  $\text{Li}_3\text{PS}_4$  (heated at 80 °C), and nanoporous  $\beta\text{-Li}_3\text{PS}_4$  (heated at 140 °C). All spectra show the characteristic peak of  $\nu_s(\text{PS}_4)$  at 422 cm<sup>-1</sup>. The C-H vibration peaks between 2850-3050 cm<sup>-1</sup> disappear after the removal of THF.

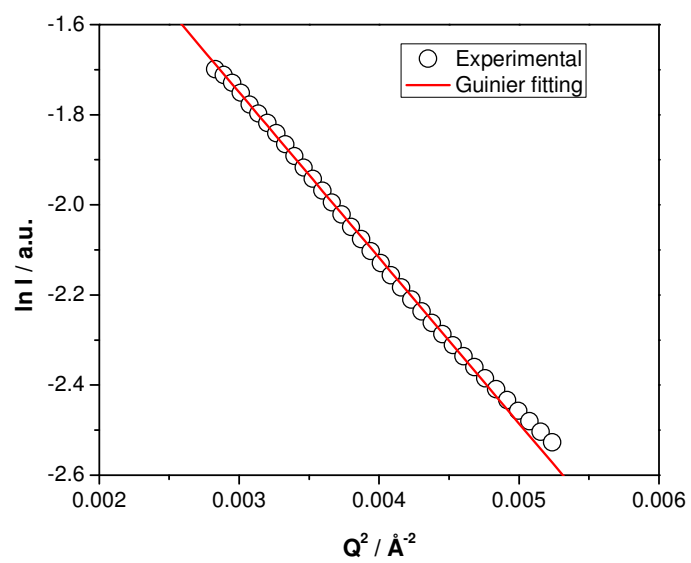

Fig S2 Small angle X-ray scattering of nanoporous  $\beta$ - $\text{Li}_3\text{PS}_4$ . The Guinier fitting of the SAXS data gives an estimated pore size of approximately 33 nm.

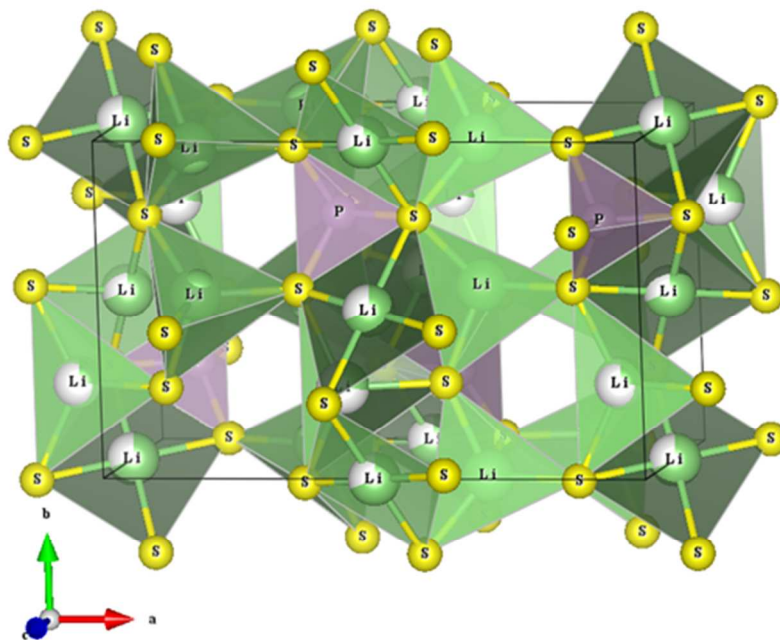

Fig S3 Crystal structure of  $\beta$ - $\text{Li}_3\text{PS}_4$  showing the interstitials along the  $c$  axis.

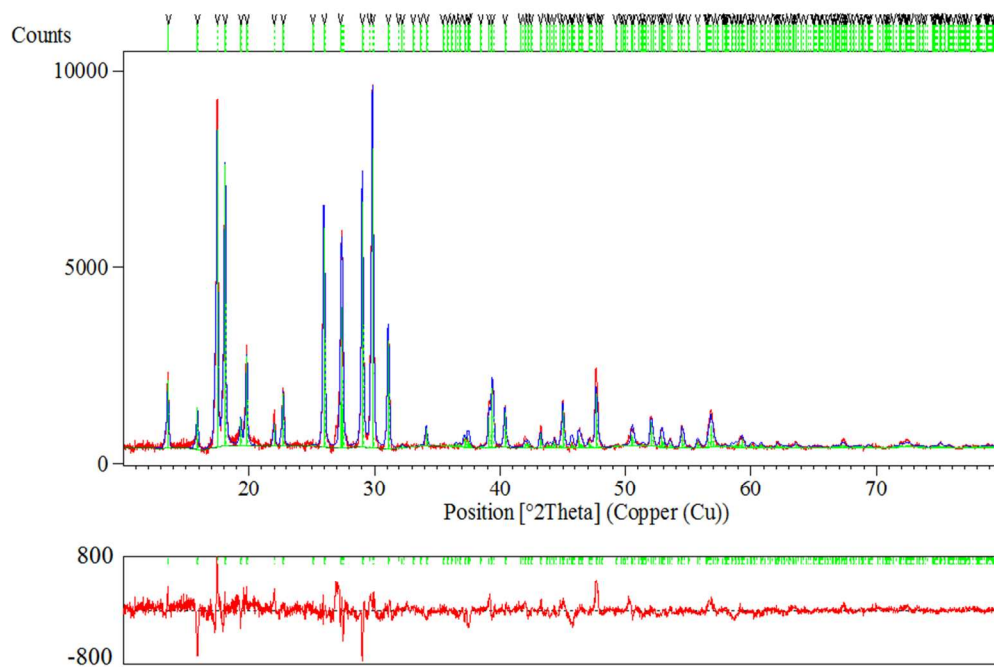

Fig S4 Rietveld refinement of XRD pattern of nanoporous  $\beta$ -Li<sub>3</sub>PS<sub>4</sub>. The X-ray diffraction pattern is indexed to orthorhombic  $\beta$ -Li<sub>3</sub>PS<sub>4</sub> (space group *pnma*,  $a=12.9857(8)$ ,  $b=8.0559(5)$ ,  $c=6.1380(3)$ ). Red: measured intensity; blue: fitted intensity; and green line: the position of the diffraction peak. The bottom shows the difference plot.

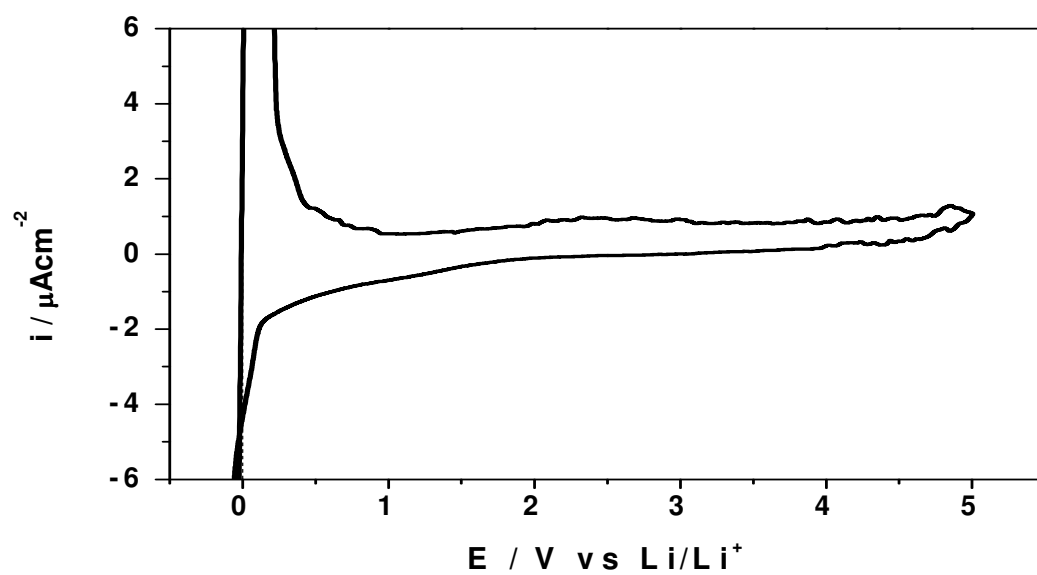

Fig S5 Cyclic voltammogram (CV) of the Li/  $\beta$ -Li<sub>3</sub>PS<sub>4</sub>/Pt cell with 10 times amplification of the current scale

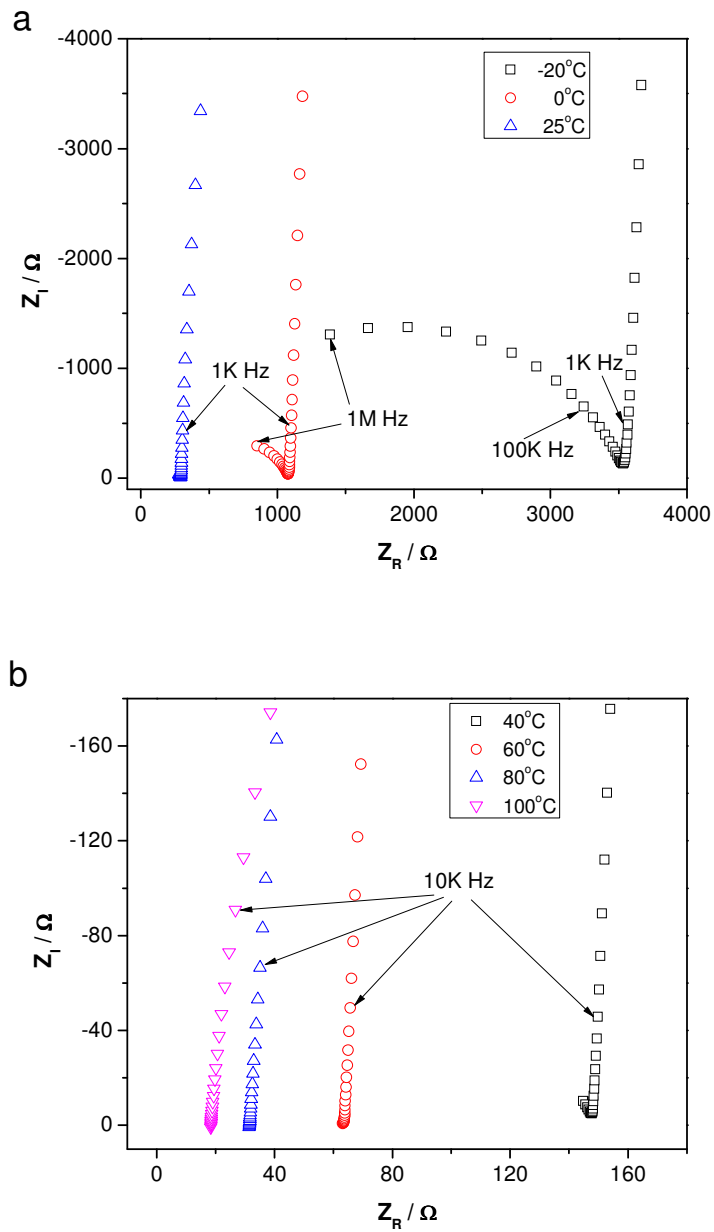

Fig S6 Impedance spectra of nanoporous  $\beta$ -Li<sub>3</sub>PS<sub>4</sub> measured at (a) -20 to 25 °C and (b) 40 to 100 °C. The total conductivity is determined by using the intercept between the semi-arc and straight line as the total resistance.
